# Supplementary material for: Artificial Intelligence and Machine Learning in Cancer Related Pain: A Systematic Review
Source: bioRxiv or medRxiv preprint supplement (doi:10.1101/2023.12.06.23299610), 2023-12-08
Supplement: Supplementary file [file media-1.pdf]

**Supplementary Table S1. Ovid MEDLINE search strategy**

|    |                                                                                                                                                                            |
|----|----------------------------------------------------------------------------------------------------------------------------------------------------------------------------|
| 1  | exp Neoplasms/                                                                                                                                                             |
| 2  | exp Medical Oncology/                                                                                                                                                      |
| 3  | (cancer* or carcinom* or tumor* or tumour* or neoplas* or malignan* or myeloma* or leuk?emia* or lymphoma* or sarcoma* or melanoma* or oncolog*).ti,ab,kf.                 |
| 4  | Oncology Nursing/                                                                                                                                                          |
| 5  | or/1-4 [Cancer or oncology]                                                                                                                                                |
| 6  | exp Pain/                                                                                                                                                                  |
| 7  | Pain Measurement/                                                                                                                                                          |
| 8  | Pain Management/                                                                                                                                                           |
| 9  | exp Analgesics, Opioid/                                                                                                                                                    |
| 10 | (pain or analgesic* or opioid*).ti,kf.                                                                                                                                     |
| 11 | or/6-10                                                                                                                                                                    |
| 12 | 5 and 11                                                                                                                                                                   |
| 13 | Cancer Pain/                                                                                                                                                               |
| 14 | 12 or 13                                                                                                                                                                   |
| 15 | limit 14 to english language                                                                                                                                               |
| 16 | (animals not (humans and animals)).sh.                                                                                                                                     |
| 17 | 15 not 16                                                                                                                                                                  |
| 18 | (mice or mouse or murine or rat or rats or rodent or cells or "in vitro" or "cell line").ti.                                                                               |
| 19 | 17 not 18                                                                                                                                                                  |
| 20 | exp Artificial Intelligence/                                                                                                                                               |
| 21 | ("machine learning" or "artificial intelligence" or "expert system*" or "deep learning" or "natural language processing" or "neural network*" or "fuzzy logic*").ti,ab,kf. |
| 22 | exp neural networks, computer/                                                                                                                                             |
| 23 | 20 or 21 or 22                                                                                                                                                             |
| 24 | 19 and 23                                                                                                                                                                  |

**Supplementary Table S2. Ovid Embase search strategy**

|    |                                                                                                                                                         |
|----|---------------------------------------------------------------------------------------------------------------------------------------------------------|
| 1  | exp malignant neoplasm/                                                                                                                                 |
| 2  | (cancer* or carcinom* or tumor* or tumour* or neoplas* or malignan* or myeloma* or leuk?emia* or lymphoma* or sarcoma* or melanoma* or oncolog*).ti,ab. |
| 3  | 1 or 2 [cancer]                                                                                                                                         |
| 4  | limit 3 to english language                                                                                                                             |
| 5  | Human/                                                                                                                                                  |
| 6  | Nonhuman/ or ANIMAL/ or Animal Experiment/                                                                                                              |
| 7  | 6 not 5                                                                                                                                                 |
| 8  | 4 not 7                                                                                                                                                 |
| 9  | (mice or mouse or murine or rat or rats or rodent or cells or "in vitro" or "cell line").ti.                                                            |
| 10 | 8 not 9 [Cancer or oncology]                                                                                                                            |
| 11 | exp *pain/                                                                                                                                              |
| 12 | cancer pain/                                                                                                                                            |
| 13 | exp pain assessment/                                                                                                                                    |
| 14 | exp pain measurement/                                                                                                                                   |

|    |                                                                                                                                                       |
|----|-------------------------------------------------------------------------------------------------------------------------------------------------------|
| 15 | pain intensity/                                                                                                                                       |
| 16 | analgesia/                                                                                                                                            |
| 17 | (pain or analgesic* or opioid*).ti,kf.                                                                                                                |
| 18 | or/11-17                                                                                                                                              |
| 19 | 10 and 18                                                                                                                                             |
| 20 | exp artificial intelligence/                                                                                                                          |
| 21 | exp machine learning/                                                                                                                                 |
| 22 | expert system/                                                                                                                                        |
| 23 | natural language processing/                                                                                                                          |
| 24 | ("machine learning" or "artificial intelligence" or "expert system*" or "deep learning" or "natural language processing" or "neural network*").ti,ab. |
| 25 | or/20-24 [machine learning]                                                                                                                           |
| 26 | 19 and 25                                                                                                                                             |
| 27 | conference abstract.pt.                                                                                                                               |
| 28 | 26 not 27                                                                                                                                             |
| 29 | (cancer* or carcinom* or tumor* or tumour* or neoplas* or malignan* or myeloma* or leuk?emia* or lymphoma* or sarcoma* or melanoma* or oncolog*).ti.  |
| 30 | exp *malignant neoplasm/                                                                                                                              |
| 31 | 29 or 30                                                                                                                                              |
| 32 | 28 and 31                                                                                                                                             |

**Supplementary Table S3. Clarivate Analytics Web of Science search strategy**

|   |                                                                                                                                                                        |
|---|------------------------------------------------------------------------------------------------------------------------------------------------------------------------|
| 1 | TS=(pain NEAR/2 (measurement or management or intensity or score))                                                                                                     |
| 2 | TI=(pain or analgesic* or opioid*) OR AK=(pain or analgesic* or opioid*) OR KP=(pain or analgesic* or opioid*)                                                         |
| 3 | #1 OR #2                                                                                                                                                               |
| 4 | TS=(cancer* or carcinom* or tumor* or tumour* or neoplas* or malignan* or myeloma* or leukaemia* or leukemia* or lymphoma* or sarcoma* or melanoma* or oncolog*)       |
| 5 | TS=(("machine learning" or "artificial intelligence" or "expert system*" or "deep learning" or "natural language processing" or "fuzzy logic*" or "neural network*" )) |
| 6 | #4 AND #5                                                                                                                                                              |
| 7 | #3 AND #6 and Meeting Abstract (Exclude – Document Types) and English (Languages)                                                                                      |
| 8 | TI=(mice or mouse or murine or rat or rats or rodent or "in vitro" or "cell line")                                                                                     |
| 9 | 7 NOT #8                                                                                                                                                               |
